## Eicosapentaenoic acid inhibits lipopolysaccharide (LPS)-induced nitrite production and cytokine release from J774 macrophages

S.C.R. Sherratt<sup>1</sup>, P. Libby<sup>2</sup>, H. Dawoud<sup>3</sup>, D.L. Bhatt<sup>2</sup>, T. Malinski<sup>3</sup>, R.P. Mason<sup>2</sup>

<sup>1</sup>Elucida Research LLC, Biophysics Department, Beverly, MA, United States of America; <sup>2</sup>Brigham and Women's Hospital, Harvard Medical School, Boston, United States of America; <sup>3</sup>Ohio University, Department of Chemistry and Biochemistry, Athens, OH, United States of America

**Funding Acknowledgement:** Type of funding sources: Private company. Main funding source(s): Amarin Pharma Inc., Elucida Research

**Background:** Eicosapentaenoic acid (EPA), an omega-3 ( $\omega$ -3) fatty acid, reduced cardiovascular (CV) events in high-risk patients (REDUCE-IT) but the mechanism is not fully understood. Activated macrophages, characterized by cytokine release and increased inducible nitric oxide synthase (iNOS) activity, contribute to atherosclerosis. As both a substrate for and potential inhibitor of cyclooxygenase (COX), EPA may reduce iNOS activity.

**Purpose:** The purpose of this study was to evaluate the dose-dependent effects of EPA on nitrite and cytokine release from lipopolysaccharide (LPS)-activated macrophages.

**Methods:** Murine J774 macrophages were pretreated with vehicle or EPA at 10, 20 and 40  $\mu$ M for 2 h, then challenged with LPS at 1.0  $\mu$ g/ml. After 24 hr, iNOS activity was measured by nitrite production using the Griess assay. EPA was compared to the COX inhibitor diclofenac at 1.0  $\mu$ g/ml. Levels of interleukin-1 $\beta$  (IL-1 $\beta$ ) and tumor necrosis factor alpha (TNF- $\alpha$ ) in

cell supernatant were measured by immunochemistry using colchicine as a positive control.

**Results:** Activated macrophages caused a >4-fold increase in nitrite production ( $p < 0.001$ ) that was reduced by EPA in a dose-dependent manner. EPA decreased nitrite levels by 40, 62 and 77% at 10, 20 and 40  $\mu$ M, respectively ( $p < 0.01$ ). Diclofenac separately reduced nitrite levels by 40% ( $p < 0.01$ ). EPA also reduced expression of IL-1 $\beta$  and TNF- $\alpha$  by 40% and 31%, respectively ( $p < 0.01$ ), in a manner similar to equimolar colchicine (10  $\mu$ M). The reductions in IL-1 $\beta$  and TNF- $\alpha$  with EPA were dose-dependent.

**Conclusions:** EPA reduced macrophage activation as evidenced by decreased nitrite production and cytokine release similar to other anti-inflammatory agents. These findings indicate a novel effect of EPA on mechanisms of inflammation associated with vascular disease.
